# Supplementary material for: Inhibition of BET bromodomain proteins as a therapeutic approach in prostate cancer
Source: PubMed Central journal article supplement (PMC3926837; doi:10.18632/oncotarget.1572), 2013-11-23
Supplement: oncotarget-04-2419-s001.pdf [file oncotarget-04-2419-s001.pdf]

**Inhibition of BET bromodomain proteins as a therapeutic approach in prostate cancer –Wyce et al**

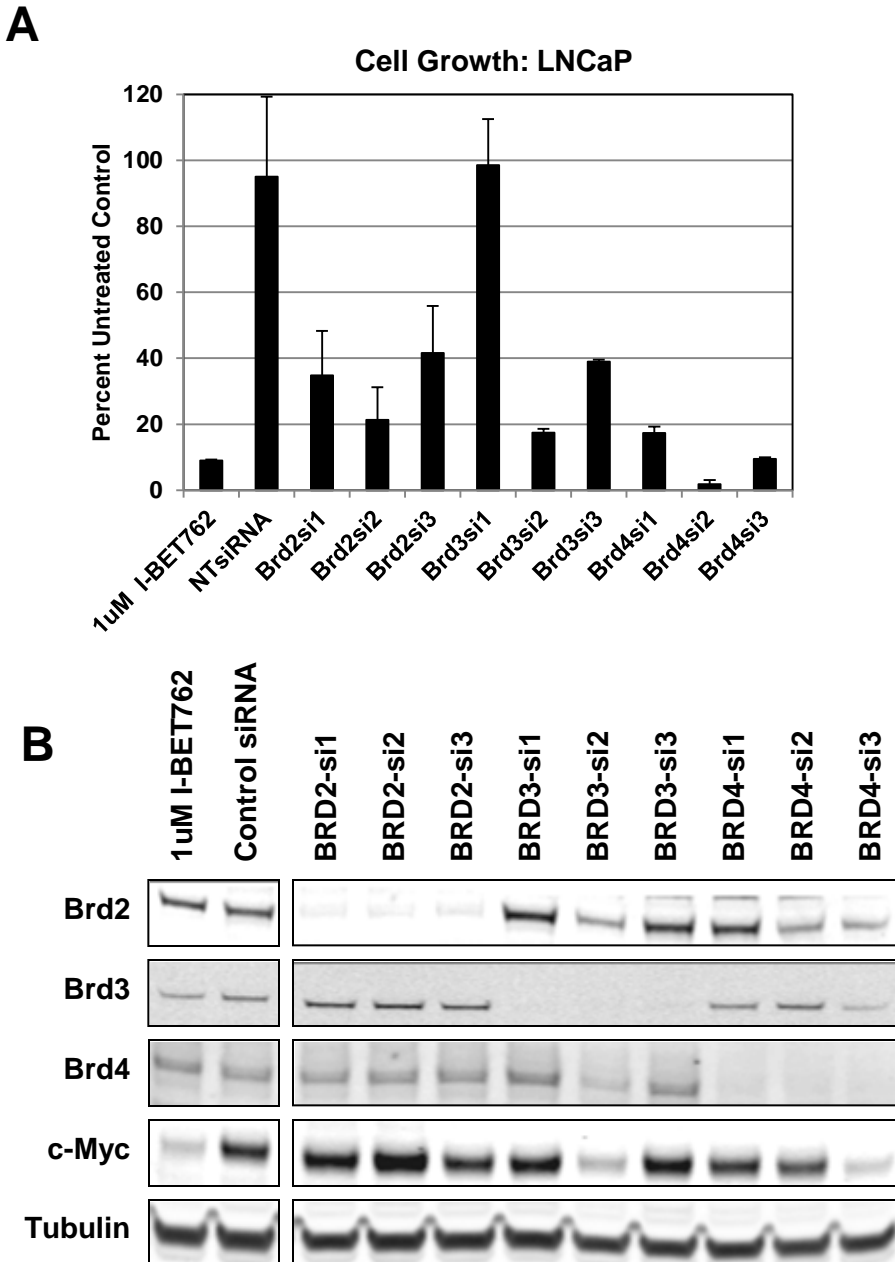

**Supplemental Figure S1:** Knockdown of *BRD2*, *BRD3*, and *BRD4* in LNCaP cells. A, Analysis of cell proliferation in I-BET762 or siRNA-treated LNCaP cells 6 days post-treatment. Data is presented as percent of untreated control cells, and represents the mean +/- SD for two independent biological replicates. B, Western blot analysis of *BRD2*, *BRD3*, *BRD4*, and c-Myc expression on day3 post-transfection.

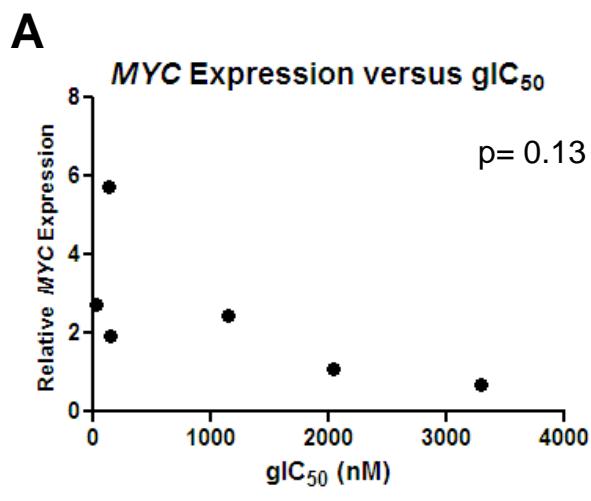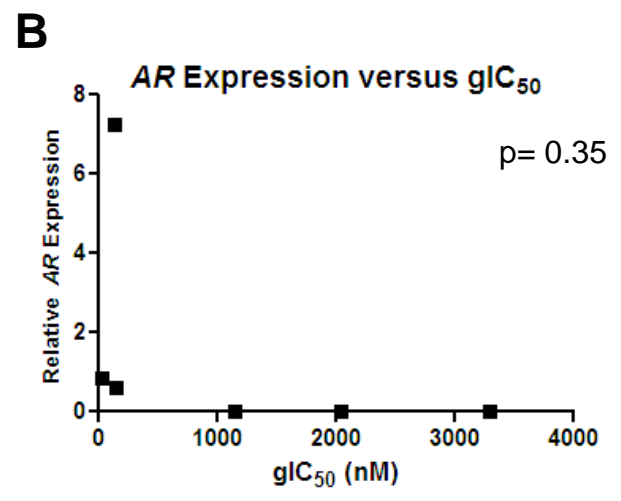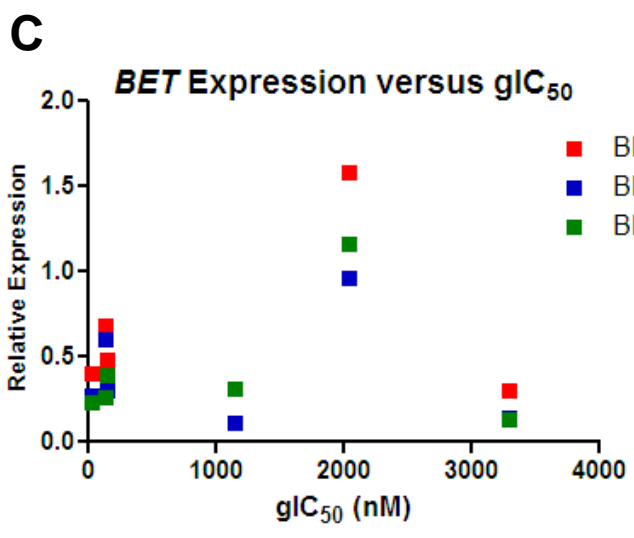

**Supplemental Figure S2:** Correlation of I-BET762 gIC<sub>50</sub> to A, MYC B, AR and C, BET family RNA expression in the prostate cell line panel. P values from two-tailed Pearson correlation analyses are indicated.

**A**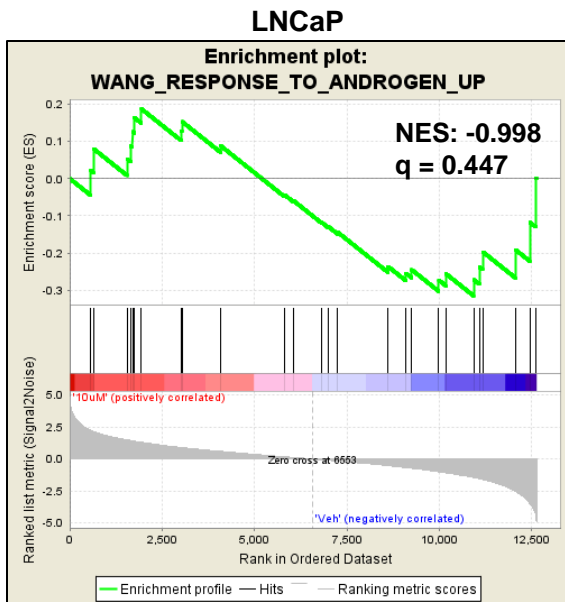**B**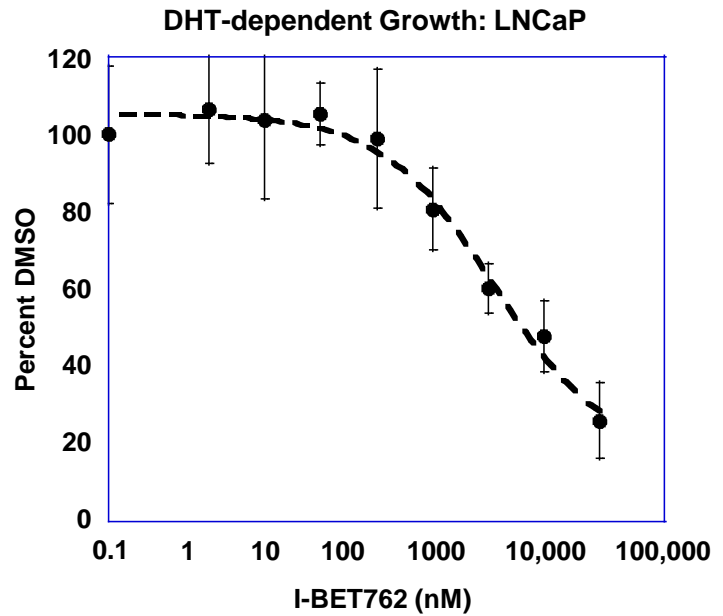

**Supplemental Figure S3:** Minimal effects on androgen-regulated gene expression or DHT-dependent growth in LNCaP cells treated with I-BET762. A, GSEA enrichment plot showing changes in an androgen-regulated gene signature in LNCaP cells treated with 10  $\mu$ M I-BET762 for 24 hours. Normalized enrichment score (NES) and FDR q value are indicated. B, Day 6 concentration-response curve for LNCaP cells grown in phenol-red free medium supplemented with 10% charcoal stripped FBS and 10 nM DHT.

**A**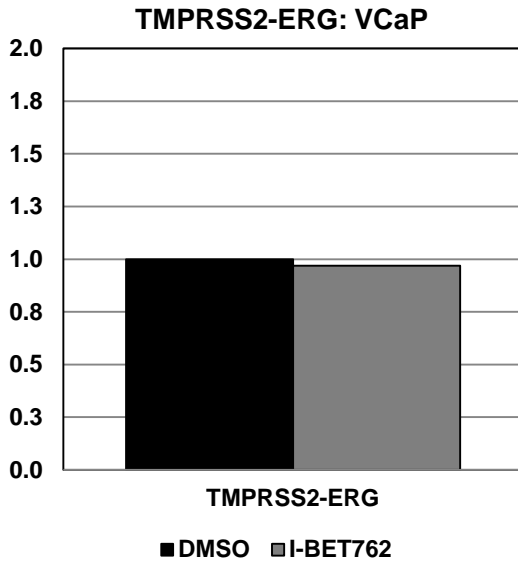**B**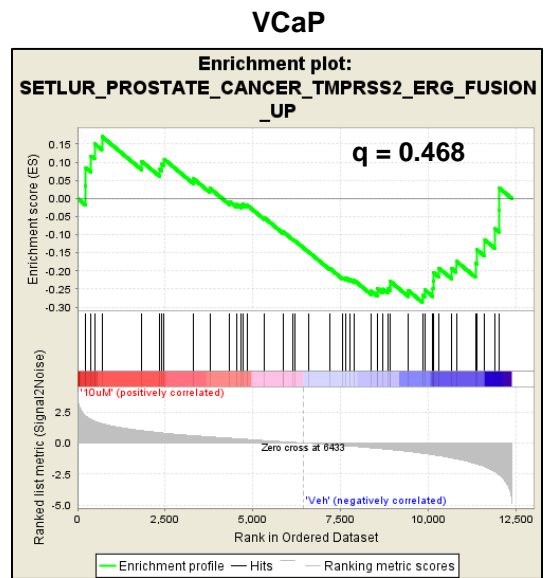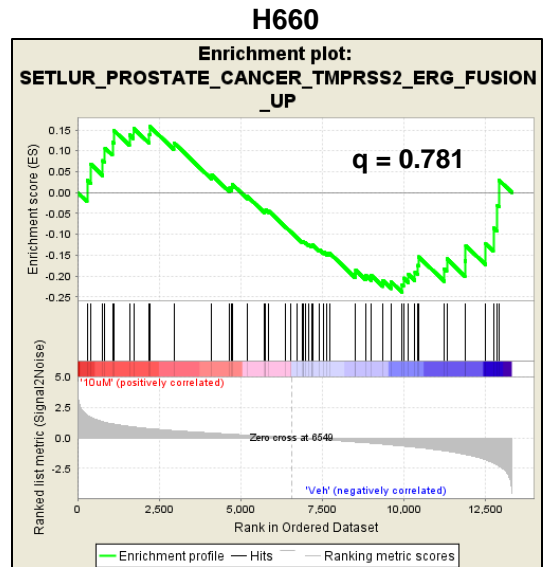

**Supplemental Figure S4:** TMPRSS2-ERG and its downstream targets are not regulated by I-BET762 treatment. A, qPCR analysis of TMPRSS2-ERG expression in the VCaP cell line following 24 hour treatment with 1  $\mu$ M I-BET762. B, GSEA enrichment plot showing changes in a TMPRSS2-ERG signature in VCaP and H660 cells treated with 10  $\mu$ M I-BET762 for 24 hours. FDR q value for each cell line is indicated.



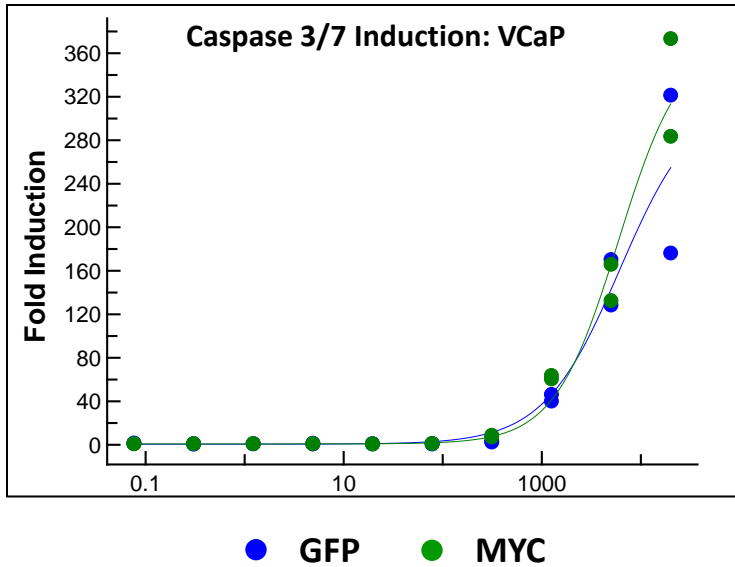

**Supplemental Figure S6:** Caspase induction in *GFP* or *MYC*-overexpressing VCaP cells following treatment with a titration of I-BET762 for six days. Data is presented as fold induction over DMSO controls, following normalization to total cell number as measured by CellTiter-Glo. Data shown were from a single experiment representative of typical results.

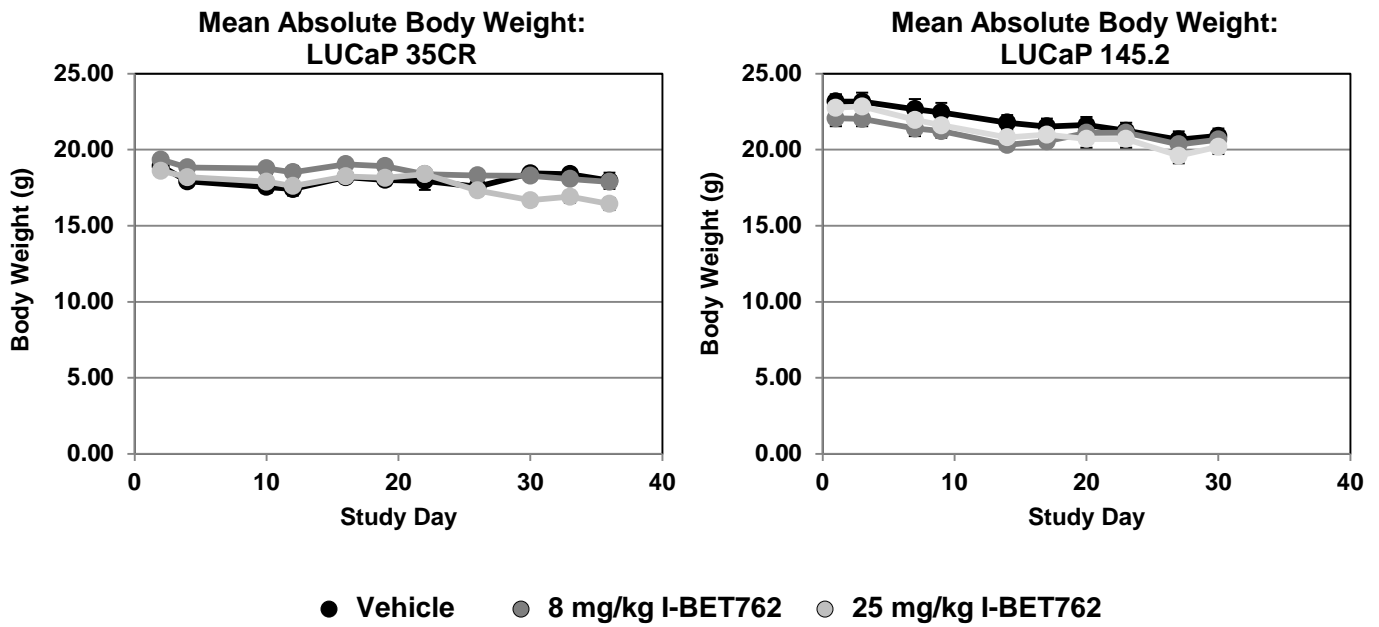

**Supplemental Figure S7:** Mean absolute body weight for mice in the LUCaP 35CR (left) and LUCaP 145.2 (right) xenograft studies treated with vehicle, 8 mg/kg, or 25 mg/kg I-BET762.
